# Supplementary material
Source: PubMed Central journal article supplement (PMC5360551)
Supplement: NIHMS816710-supplement-1.pdf [file NIHMS816710-supplement-1.pdf]

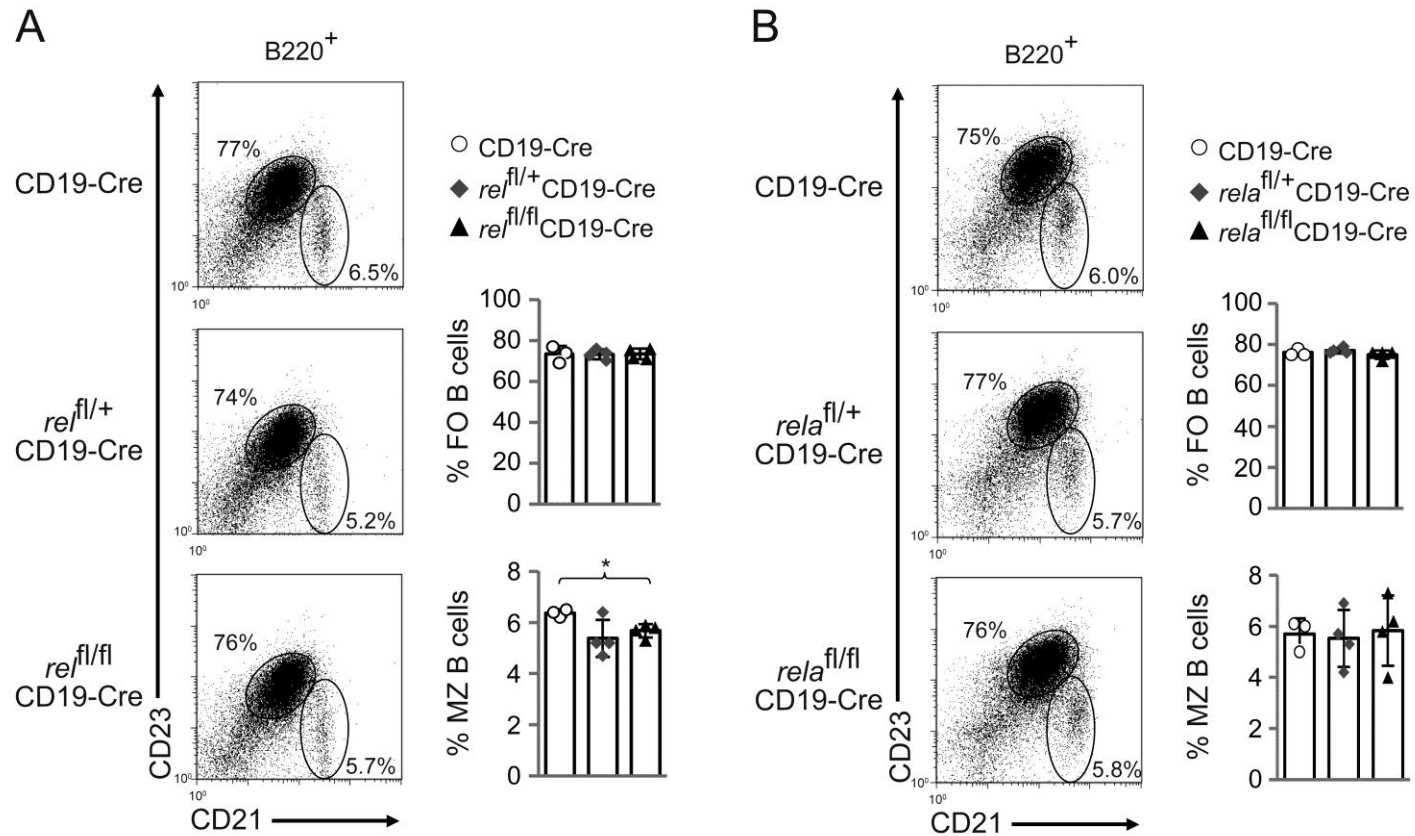

Supplementary Figure 1

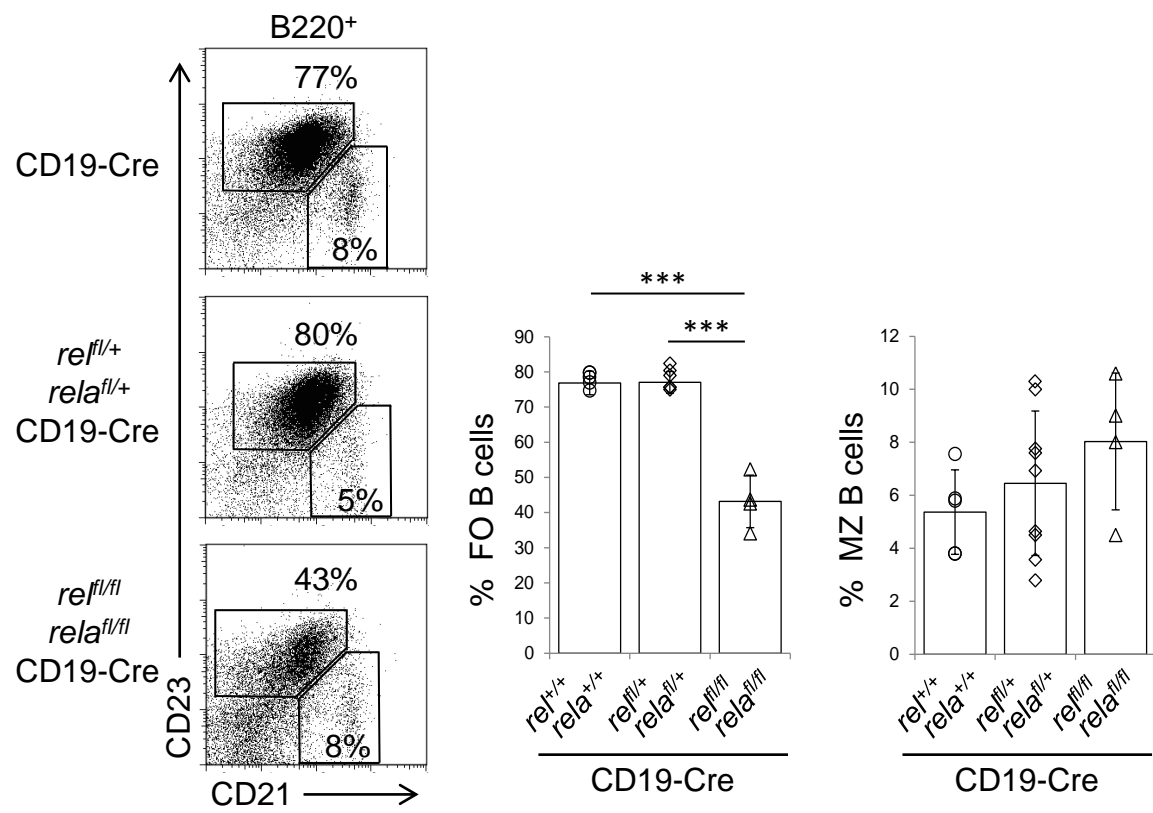

Supplementary Figure 2

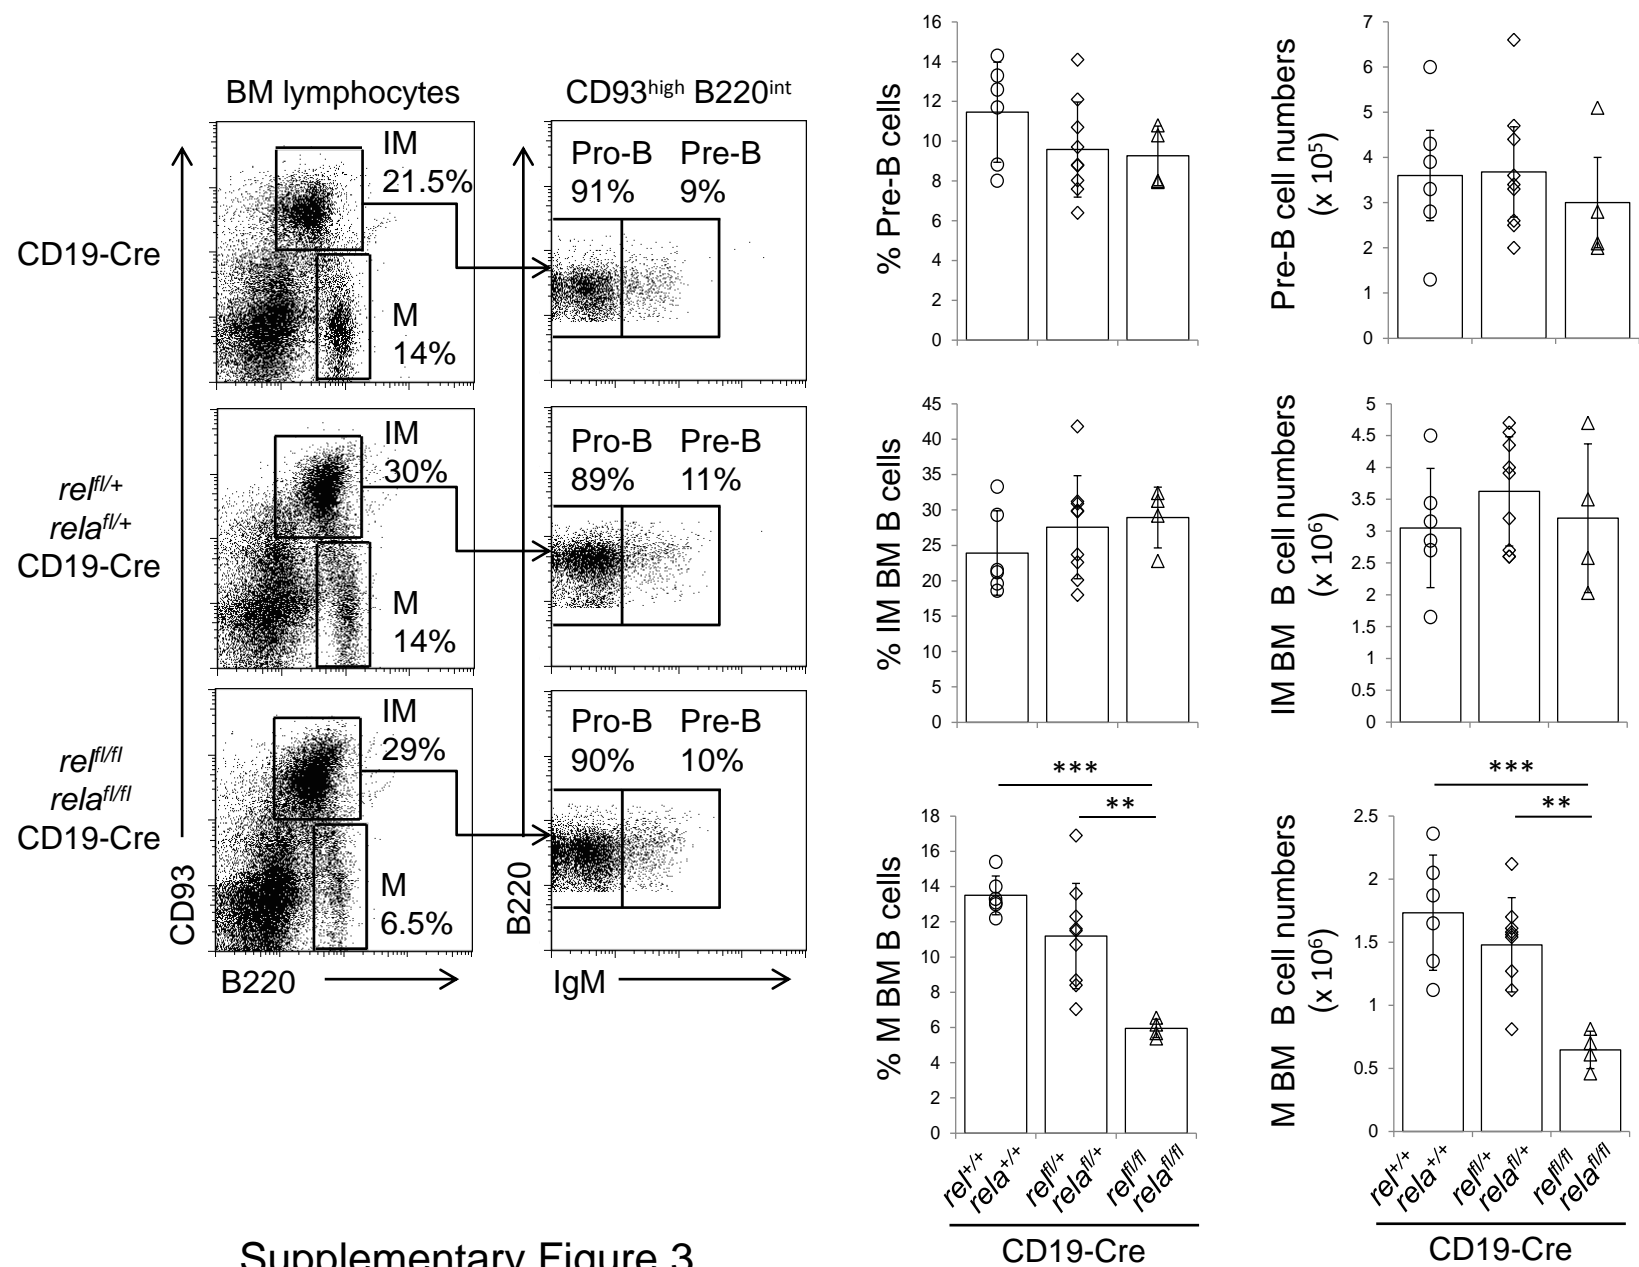

Supplementary Figure 3

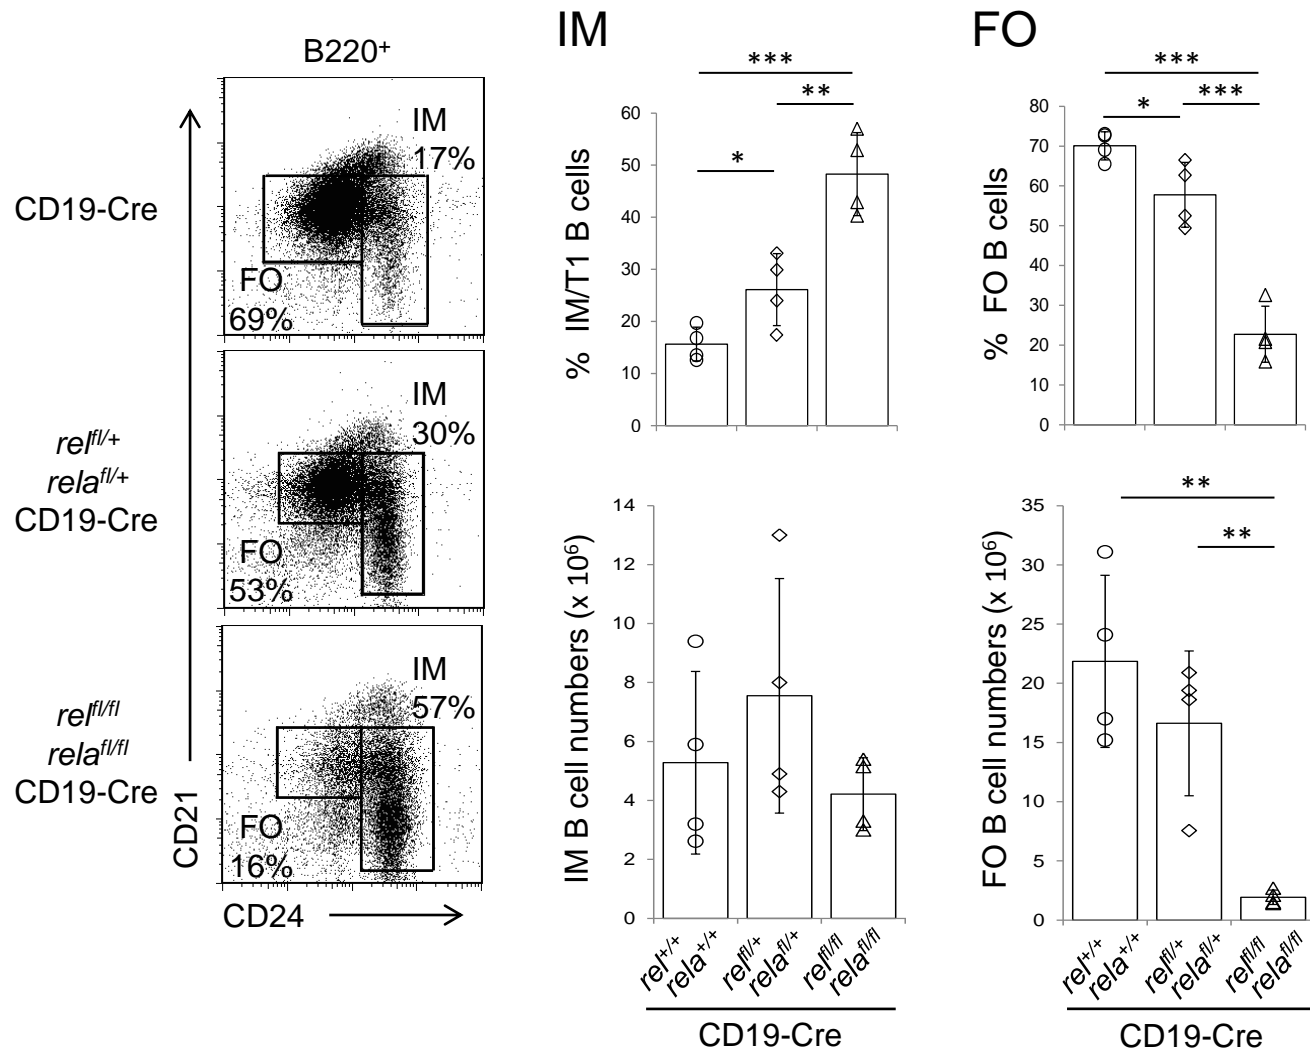

Supplementary Figure 4

A

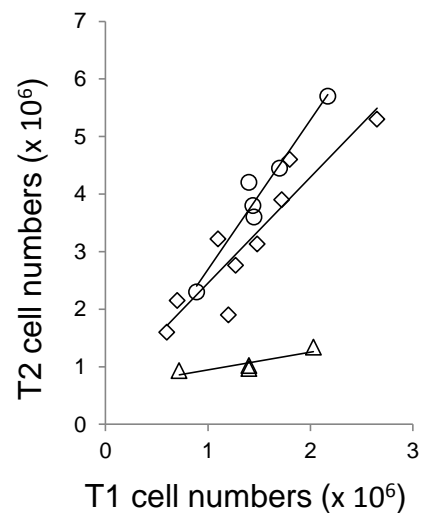

- *rel<sup>+/+</sup>rela<sup>+/+</sup>* CD19-Cre  
 ◇ *rel<sup>fl/fl</sup>rela<sup>fl/fl</sup>* CD19-Cre  
 △ *rel<sup>fl/fl</sup>rela<sup>fl/fl</sup>* CD19-Cre

B

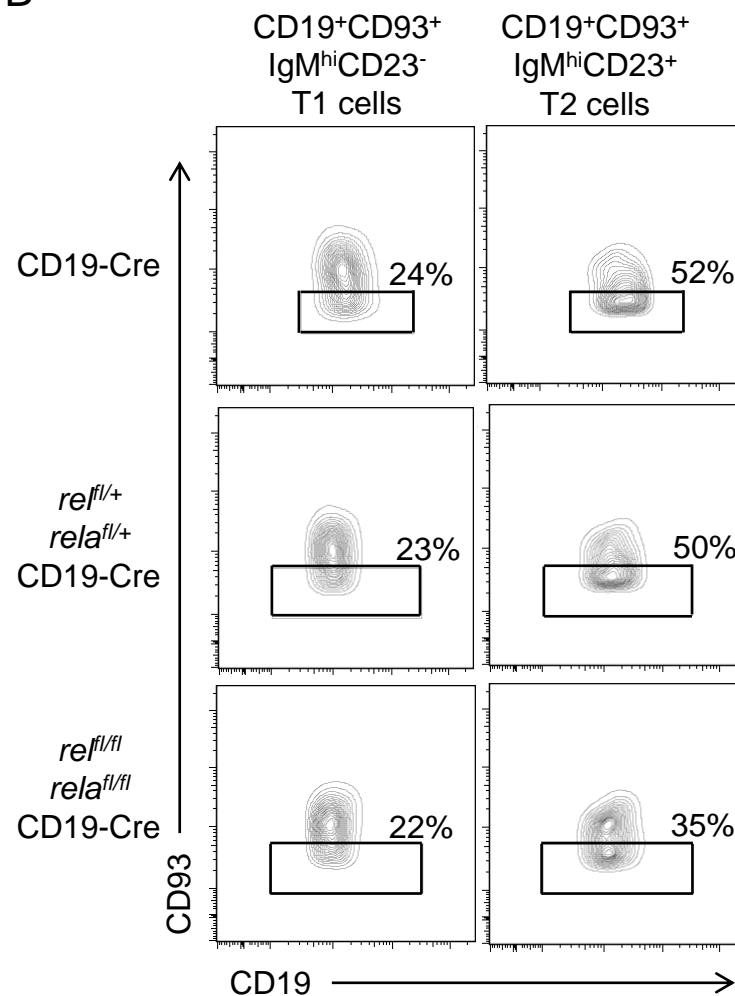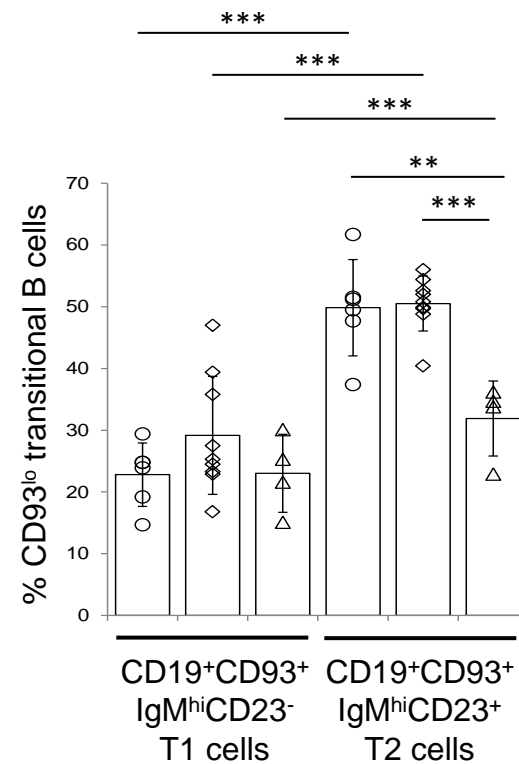

Supplementary Figure 5

**Supplementary Fig. 1. Mice deficient for c-REL or RELA in B-cells show normal development of splenic B-cell subsets.** (A,B) CD23 and CD21 expression by splenic B-cells from *rel<sup>fl/fl</sup>*CD19-Cre or *rela<sup>fl/fl</sup>*CD19-Cre and heterozygous and CD19-Cre control mice were analyzed by flow cytometry. (*left*) Numbers beside gates indicate the percentage of CD23<sup>+</sup>CD21<sup>low</sup> follicular (FO) or CD23<sup>-</sup>CD21<sup>hi</sup> marginal zone (MZ) B-cells. (*right*) Summary of the frequencies of follicular and MZ B-cells. Data are cumulative from independent experiments (n=3-5 per group), with each symbol representing a mouse. Data are shown as mean  $\pm$  standard deviation. Statistical significance was determined by Student's *t* test (\*,  $P<0.05$ ).

**Supplementary Fig. 2. Mice deficient for both c-REL and RELA in B-cells show a reduction in the fraction of FO B-cells.** CD21 and CD23 expression of splenic B-cells from mice of the indicated genotypes were analyzed by flow cytometry. (*left*) Numbers beside gates indicates the percentage of follicular (CD23<sup>+</sup>CD21<sup>int</sup>) and MZ (CD21<sup>hi</sup>CD23<sup>-</sup>). (*right*) Summary of the frequencies of follicular and MZ B-cells. Data are cumulative from independent experiments (n=4-9 per group), with each symbol representing a mouse. Data are shown as mean  $\pm$  standard deviation. Statistical significance was determined by Student's *t* test (\*\*\*,  $P<0.001$ ).

**Supplementary Fig. 3. Combined c-REL and RELA deficiency does not impair B-cell maturation in the bone marrow.** B220, CD93 and IgM expression of bone marrow (BM) cells from mice of the indicated genotypes were analyzed by flow cytometry. (*left*) Numbers beside gates indicates the percentage of immature B-cells (IM; B220<sup>lo</sup>CD93<sup>hi</sup>), mature B-cells (M; B220<sup>+</sup>CD93<sup>lo</sup>), pro-B (B220<sup>lo</sup>CD93<sup>hi</sup>IgM<sup>-</sup>) and pre-B (B220<sup>lo</sup>CD93<sup>hi</sup>IgM<sup>+</sup>) cells. (*right*) Summary of the frequencies of pre-B, immature and mature BM B-cells. Data are cumulative from independent experiments (n=4-9 per group), with each symbol representing a mouse. Data are shown as mean  $\pm$  standard deviation. Statistical significance was determined by Student's *t* test (\*\*,  $P<0.01$ ; \*\*\*,  $P<0.001$ ).

**Supplementary Fig. 4. Most peripheral B-cells in c-REL/RELA-deficient mice express high levels of CD24.** B220, CD24 and CD21 expression of splenic B-cells from mice of the indicated genotypes were analyzed by flow cytometry. (*left*) Numbers beside gates indicate the percentage of immature B-cells (IM; B220<sup>+</sup>CD24<sup>hi</sup>CD21<sup>lo</sup>) and FO B-cells (B220<sup>+</sup>CD24<sup>lo</sup>CD21<sup>int</sup>). (MZ B-cells are found among B220<sup>+</sup>CD24<sup>int</sup>CD21<sup>hi</sup> B-cells.) (*right*) Summary of the frequencies of immature and mature B-cells. Data are cumulative from independent experiments (n=4 per group), with each symbol representing a mouse. Data are shown as mean  $\pm$  standard deviation. Statistical significance was determined by Student's *t* test (\*,  $P<0.05$ ; \*\*,  $P<0.01$ ; \*\*\*,  $P<0.001$ ).

**Supplementary Fig. 5. Further characterization of the block in the T1 to T2 transition in *rel<sup>fl/fl</sup>rela<sup>fl/fl</sup>*CD19-Cre mice.** (A) T2 cellularity as a function of T1 cell numbers. Data are from independent experiments (n=4-9 per group), with each symbol representing a mouse. Lines represent the best-fitting linear function, forced to go through the origin. (B) Determination of the percentage of CD93<sup>lo</sup> cells within T1 and T2 populations of the indicated genotypes. (*left*) Numbers beside gates indicates the percentage of CD93<sup>lo</sup> cells among CD19<sup>+</sup>CD93<sup>+</sup>IgM<sup>hi</sup>CD23<sup>-</sup> T1 and CD19<sup>+</sup>CD93<sup>+</sup>IgM<sup>hi</sup>CD23<sup>+</sup> T2 cells. (*right*) Summary of the frequencies of CD93<sup>lo</sup> transitional B-cells. Data are cumulative from independent experiments (n=4-9 per group), with each symbol representing a mouse. Data are shown as mean  $\pm$  standard deviation. Statistical significance was determined by Student's *t* test (\*\*,  $P<0.01$ ; \*\*\*,  $P<0.001$ ).
